# Supplementary material for: Citicoline in severe traumatic brain injury: indications for improved outcome
Source: Springer Nature journal article supplement (doi:10.1007/s00508-017-1240-9), 2017-07-27
Supplement: MOESM4 [file 14915124]

| **S1 Table. Patterns of citicoline use at WNH.** | | | |
| --- | --- | --- | --- |
| Variable | Survived  (N=61) | Dead  (N=6) | p |
| Number of days of citicoline use, mean (SD) | 13.9 (6.6) | 13.2 (6.3) | 0.795 |
| Percent days, mean % (SD) | 72 % (24) | 66 % (21) | 0.557 |
| Daily dose of citicoline (g), mean (SD) | 2.55 (0.24) | 2.58 (0.11) | 0.572 |

SD, standard deviation.
