# Supplementary material for: Citicoline in severe traumatic brain injury: indications for improved outcome
Source: Springer Nature journal article supplement (doi:10.1007/s00508-017-1240-9), 2017-07-27
Supplement: MOESM6 [file 14915124]

| **S3 Table.** Medication parameters of citicoline patients at WNH (at hospital discharge) | | | |
| --- | --- | --- | --- |
| Variable | Survived  (N=61)  91 % | Dead  (N=6)  9 % | P |
| *Noradrenaline drips* | | | |
| Used, N (% Yes) | 58 (95%) | 6 (100%) | 1 |
| Days used, mean (SD) | 13.9 (9.4) | 12.6 (8.2) | 0.734 |
| Percent days, mean (SD) | 64 (20) | 62 (26) | 0.841 |
| Mean dose, µg/kg/min (SD) | 0.119 (0.06) | 0.218 (0.19) | 0.246 |
| *Hydroxyethyl starch* | | | |
| Used, N (% Yes) | 59 (97%) | 6 (100%) | 1 |
| Days used, mean (SD) | 7.3 (5.1) | 7.8 (5.2) | 0.83 |
| Percent days, mean (SD) | 37 (19) | 38 (13) | 0.826 |
| Mean dose, ml/d (SD) | 646 (196) | 686 (137) | 0.534 |
| *HyperHES fluid* | | | |
| Used, N (% Yes) | 39 (64%) | 5 (83%) | 0.614 |
| Days used, mean (SD) | 2 (1-4) | 1 (1-2) | 0.65 |
| Percent days, mean (SD) | 11 (5-21) | 8 (6-9) | 0.67 |
| Mean dose, ml/d (IQR) | 120 (98-162) | 86 (80-88) | 0.107 |
| *Mannitol fluid* | | | |
| Used, N (% Yes) | 39 (64%) | 4 (67%) | 1 |
| Days used, mean (SD) | 2 (1-5) | 1 (1-3) | 0.401 |
| Percent days, mean (SD) | 11 (6-24) | 8 (6-13) | 0.452 |
| Mean dose, ml/d (SD) | 150 (125-225) | 125 (125-133) | 0.206 |
| *Midazolam drips* | | | |
| Used, N (% Yes) | 49 (80%) | 5 (83%) | 1 |
| Days used, mean (SD) | 9.7 (5.6) | 10.4 (9.6) | 0.886 |
| Percent days, mean (SD) | 47 (25) | 48 (32) | 0.942 |
| Mean dose, mg/kg/hr (SD) | 0.124 (0.03) | 0.120 (0.04) | 0.927 |
| *Propofol drips* | | | |
| Used, N (% Yes) | 61 (100%) | 6 (100%) | - |
| Days used, median, (IQR) | 7.1 (4.8) | 3.8 (2.6) | **0.026** |
| Percent days, median (IQR) | 37 (22) | 22 (16) | 0.062 |
| Mean dose, mg/kg/hr (SD) | 0.92 (0.6) | 0.58 (0.25) | **0.02** |
| *Clonidine drips* | | | |
| Used, N (% Yes) | 58 (95%) | 5 (83%) | 0.797 |
| Days used, mean (SD) | 11.9 (9.8) | 10.6 (10.3) | 0.792 |
| Percent days, mean (SD) | 52 (24) | 39 (26) | 0.337 |
| Mean dose, µg/kg/hr (SD) | 0.8 (0.3) | 0.64 (0.35) | 0.381 |
| *Remifentanil drips* | | | |
| Used, N (% Yes) | 50 (82%) | 6 (100%) | 0.576 |
| Days used, mean (SD) | 4.3 (3.6) | 4.7 (5.3) | 0.875 |
| Percent days, mean (SD) | 23 (19) | 17 (9) | 0.205 |
| Mean dose, µg/kg/hr (SD) | 0.057 (0.05) | 0.028 (0.01) | **<0.01** |
| *Sufentanil drips* | | | |
| Used, N (% Yes) | 47 (77%) | 6 (100%) | 0.427 |
| Days used, mean (SD) | 13.1 (8.2) | 12.6 (10.3) | 0.939 |
| Percent days, mean (SD) | 57 (23) | 62 (36) | 0.764 |
| Mean dose, µg/kg/hr (SD) | 0.986 (0.44) | 0.679 (0.51) | 0.207 |
| *Ketamine drips* | | | |
| Used, N, (% Yes) | 48 (79%) | 5 (83%) | 1 |
| Days used, mean, (SD) | 9.1 (6) | 10.6 (8.8) | 0.734 |
| Percent days, mean, (SD) | 45 (25) | 50 (24) | 0.669 |
| Mean dose, mg/kg/hr (SD) | 0.48 (0.15) | 0.4 (0.17) | 0.43 |

P-values meaning significant differences are in bold. IQR, interquartile range; SD, standard deviation.

We added medication data using the following variables:

1) proportion of patients in which the respective drug was used;

2) total number of days of medication use;

3) percent of days of medication use out of the total number of treatment days calculated as the mean percentage across compared categories (e.g. for survivors: the mean of percentage of days of respective medication use out of all treatment days in every surviving patient);

4) mean daily dose of medication calculated as mean dosage administered during each treatment day. Medians were calculated where the mean was not appropriate to use.
