# Supplementary material for: Citicoline in severe traumatic brain injury: indications for improved outcome
Source: Springer Nature journal article supplement (doi:10.1007/s00508-017-1240-9), 2017-07-27
Supplement: MOESM7 [file 508_2017_1240_MOESM7_ESM.docx]

| **S4 Table.** Preliminary RCT study design for continuous and early citicoline in sTBI in Austria |
| --- |
| Parameters* to assess clinical severity and therapeutic interventions |
| GCS on site and on admission (*must not be > 8 to fulfill criteria for sTBI*)  ISS (AIS head > 2)  CT scan on admission, on day 6 and 15  Blood gas analysis (BGA) on admission at hospital, at ICU and daily during the first 6 days  ICP  CPP  Therapeutic interventions, concurrent medication, surgery  Therapeutic interventions to control ICP (surgery, pharmacological and physical treatment)  Standard laboratory assessment on admission, day 6 and 15 as specified  S-100 and/or neuron specific enolase (NSE) on admission, day 2, 3 and 6  All (serious) adverse events |
| Primary outcome measures |
| Mortality  GOS  GOSE (structured interview by a trained local staff member, scored by the investigator according to the standardized approach) [26] |
| Secondary outcome measures |
| ICP  CPP  Therapeutic intensity levels  Changes in intracranial pathologic findings as assessed on the CT scan obtained on day 6 |

* *Clinical data will be collected through a web based case-report form (CRF) with built-in plausibility check. CT scans shall be reviewed and scored by a central reader.*

AIS: Abbreviated Injury Scale; CPP: Cerebral perfusion pressure; CT: Computed tomography; GCS: Glasgow Coma Scale; GOSE: Glasgow Outcome Scale Extended; ICP: Intracranial pressure; ISS: Injury Severity Score; NSE: Neuron specific enolase; sTBI: Severe traumatic brain injury; WNH: Wiener Neustadt Hospital.
